# Supplementary material for: Integrative transcriptomic and single-cell analyses identify KLRD1 enrichment in exhausted CD8⁺ T cells in cutaneous squamous cell carcinoma
Source: Research Square preprint supplement (doi:10.21203/rs.3.rs-8726237/v1), 2026-02-02
Supplement: Supplementary file 1 [file 44c572a14fe313725b827e1c.xlsx]

## Sheet: Sheet1
Gene	Primer sequence (5′–3′)
KLRD1-Forward	TTGGAACGAAAGTCGGCATC
KLRD1-Reverse	CATTCTCCCACAACCAGGCG
PTPN6-Forward	GTCCGAGGATACAGCCAAGG
PTPN6-Reverse	TCTTGTAGCGGTTCTTGCCC
CTSD-Forward	GCCCGACTTGCTGTTTTGTT
CTSD-Reverse	TCTGGATCAGCTCTACCCCC
GAPDH-Forward	GGACCTGACCTGCCGTCTAG
GAPDH-Reverse	GTAGCCCAGGATGCCCTTGA
